**Carbon for nutrient exchange between the lycophyte, *Lycopodiella inundata* and Mucoromycotina ‘fine root endophytes’ is unresponsive to high atmospheric CO<sub>2</sub> concentration.**

Grace A. Hoysted<sup>1\*</sup>, Jill Kowal<sup>2</sup>, Silvia Pressel<sup>3</sup>, Jeffrey G. Duckett<sup>3</sup>, Martin I. Bidartondo<sup>2,4</sup>, Katie J. Field<sup>1</sup>

<sup>1</sup>Department of Animal and Plant Sciences, University of Sheffield, Sheffield, S10 2TN, UK

<sup>2</sup>Comparative Plant & Fungal Biology, Royal Botanic Gardens, Kew, Richmond TW9 3DS, UK

<sup>3</sup>Department of Life Sciences, Natural History Museum, London SW7 5BD, UK

<sup>4</sup>Department of Life Sciences, Imperial College London, London, SW7 2AZ, UK

Running Title: Lycopod-Mucoromycotina FRE interactions unaffected by high atmospheric CO<sub>2</sub>

\* Corresponding author – g.hoysted@sheffield.ac.uk

# 1    **Background and Aims**

2    Non-vascular plants associating with arbuscular mycorrhizal (AMF) and Mucoromycotina  
 3    ‘fine root endophyte’ (MFRE) fungi derive greater benefits from their fungal associates under  
 4    higher atmospheric [CO<sub>2</sub>] than ambient, however nothing is known about how changes in  
 5    [CO<sub>2</sub>] affects MFRE function in vascular plants.

# 6    **Methods**

7    We measured movement of phosphorus (P), nitrogen (N) and carbon (C) between the  
 8    lycophyte, *Lycopodiella inundata* and Mucoromycotina fine root endophyte fungi using <sup>33</sup>P-  
 9    orthophosphate, <sup>15</sup>N-ammonium chloride and <sup>14</sup>CO<sub>2</sub> isotope tracers under ambient and  
 10    elevated atmospheric [CO<sub>2</sub>] concentrations of 440 and 800 ppm, respectively.

# 11    **Key Results**

12    Transfer of <sup>33</sup>P and <sup>15</sup>N from MFRE to plant were unaffected by changes in [CO<sub>2</sub>]. There was  
 13    a slight increase in C transfer from plant to MFRE under elevated [CO<sub>2</sub>].

# 14    **Conclusions**

15    Our results demonstrate that the exchange of C-for-nutrients between a vascular plant and  
 16    Mucoromycotina FRE is largely unaffected by changes in atmospheric [CO<sub>2</sub>]. Unravelling  
 17    the role of MFRE in host plant nutrition and potential C-for-N trade changes between  
 18    symbionts under varying abiotic conditions is imperative to further our understanding of the  
 19    past, present and future roles of diverse plant-fungal symbioses in global ecosystems.

20

21    Key words: Lycophyte, *Lycopodiella inundata*, Mucoromycotina, Fine root endophytes,

22    Vascular plants, Atmospheric CO<sub>2</sub>

23

24

25

# 1 Introduction

2 Changes in atmospheric CO<sub>2</sub> concentration ([CO<sub>2</sub>]) have been a prominent feature  
3 throughout Earth's environmental history (Leaky and Lau, 2012). Geochemical models  
4 support fossil and stable isotope evidence that the global environment underwent major  
5 changes throughout the Palaeozoic Era (541-250 Ma) (Berner et al., 2006; Bergman et al.,  
6 2004; Lenton et al., 2016), consisting of a step-wise increase of the Earth's atmospheric  
7 oxygen ([O<sub>2</sub>]), and a simultaneous decline in atmospheric [CO<sub>2</sub>]. Today, Earth faces  
8 environmental changes on a similar scale, but with atmospheric [CO<sub>2</sub>] now rising at an  
9 unprecedented rate (Meinshausen et al., 2011).

10 Long before plants migrated onto land, Earth's terrestrial surfaces were colonised by a  
11 diverse array of microbes, including filamentous fungi (Blair, 2009; Berbee et al., 2017).  
12 Around 500 Mya, plants made the transition from an aquatic to a terrestrial existence (Morris  
13 et al., 2018), facilitated by symbiotic fungi (Nicolson, 1967; Pirozynski and Malloch, 1975).  
14 These ancient fungal symbionts are thought to have played an important role in helping the  
15 earliest land plants access scarce nutrients from the substrate onto which they had emerged,  
16 in much the same way as modern-day mycorrhizal fungi form nutritional mutualisms with  
17 plant roots (Pirozynski and Malloch, 1975; Krings et al., 2012). It is highly likely that ancient  
18 mycorrhiza-like fungi were closely related to, and subsequently evolved into, modern  
19 arbuscular mycorrhizal fungi (AMF) belonging to the fungal subphylum Glomeromycotina  
20 (also referred to as phylum Glomeromycota) (Redecker et al., 2000; Wijayawardene et al.,  
21 2018; Radhakrishnan et al., 2020).

22 Recently, it was discovered that extant non-vascular plants, including the earliest  
23 divergent clade of liverworts, associate with a greater diversity of fungi than was previously  
24 thought, notably forming endophytic associations with members of the Mucoromycotina  
25 (Bidartondo et al., 2011; Desiró et al., 2014; Rimington et al., 2015; Field et al., 2015a). The

1 Mucoromycotina is a partially-saprotrophic fungal lineage (Bidartondo et al., 2011; Field et  
2 al., 2015b; 2016) sister to, or pre-dating, the Glomeromycotina AMF, both within  
3 Mucoromycota (Spatafora et al., 2017). This discovery, together with the finding that  
4 liverwort-Mucoromycotina fungal associations are nutritionally mutualistic (Field et al.,  
5 2015a; 2019), often co-occurring with AMF (Field et al., 2016), and emerging fossil evidence  
6 (Strullu-Derrien et al., 2014) suggest that the earliest land plants had greater symbiotic  
7 options available to them than was previously thought (Field et al., 2015b). Studies now show  
8 that symbioses with Mucoromycotina fungi are not limited to early non-vascular plants, but  
9 also span almost the entire extant land plant kingdom (Rimington et al., 2015; Orchard et al.,  
10 2017a; Hoysted et al., 2018, 2019; Rimington et al., 2020), suggesting that this ancient  
11 association may have key roles in modern terrestrial ecosystems.

12 Latest research into the functional significance of plant-Mucoromycotina fine root  
13 endophyte (MFRE) associations indicates that MFRE play a complementary role to AMF by  
14 facilitating plant nitrogen (N) assimilation alongside AMF-facilitated plant phosphorus (P)  
15 acquisition through co-colonisation of the same plant host (Field et al., 2019). Such  
16 functional complementarity is further supported by the observation that MFRE transfer  
17 significant amounts of  $^{15}\text{N}$  but relatively little  $^{33}\text{P}$  tracers to a host lycophyte *Lycopodiella*  
18 *inundata* in the first experimental demonstration of MFRE nutritional mutualism in a  
19 vascular plant (Hoysted et al., 2019). These results contrast with the majority of studies on  
20 MFRE and FRE which have, to date, focussed on the role of the fine root endophytes in  
21 mediating plant phosphorus (P) acquisition (Orchard et al., 2017b, and literature within).

22 Today, plant symbiotic fungi play critical roles in ecosystem structure and function.  
23 The bidirectional exchange of plant-fixed carbon (C) for fungal-acquired nutrients that is  
24 characteristic of most mycorrhizal symbioses (Field and Pressel, 2018) holds huge  
25 significance for carbon and nutrient flows and storage across ecosystems (Leake et al., 2004;

1 Rillig, 2004). By forming mutualistic symbioses with the vast majority of plants, including  
 2 economically-important crops, mycorrhizal fungi have great potential for exploitation within  
 3 a variety of sustainable management strategies in agriculture, conservation and restoration.  
 4 Application of diverse mycorrhiza-forming fungi, including both AMF and MFRE, to  
 5 promote sustainability in agricultural systems is particularly relevant in the context of global  
 6 climate change and depletion of natural resources (Field et al., 2020). MFRE in particular  
 7 hold potential for applications to reduce use of chemical fertilisers within sustainable arable  
 8 systems where routine over-application of N-based mineral fertilisers causes detrimental  
 9 environmental and down-stream economic impacts (Thirkell et al., 2017). Changes in abiotic  
 10 factors such as atmospheric [CO<sub>2</sub>] (Cotton, 2018), which is predicted to continue rising in the  
 11 future (Meinshausen et al., 2011), has been shown to affect the rate and quantities of carbon  
 12 and nutrients exchanged between mycorrhizal partners (Field et al., 2012, 2015a, 2016;  
 13 Zheng et al., 2015; Thirkell et al., 2019). As such, insights into the impact of environmental  
 14 factors relevant to future climate change on carbon for nutrient exchange between symbiotic  
 15 fungi and plants must be a critical future research goal.

16       The direct quantification of exchange of plant C and fungal-acquired mineral  
 17 nutrients, using isotope tracers, has shed important new light on the impact of varying  
 18 atmospheric [CO<sub>2</sub>] on C-for-nutrient exchanges between plants and their symbiotic fungi  
 19 (Field et al., 2012, 2015a, 2016; Zheng et al., 2015; Thirkell et al., 2019). Experiments with  
 20 liverworts associating with MFRE fungi, either in exclusive or in dual symbioses alongside  
 21 AMF, suggest that these plants derive less benefit in terms of nutrient assimilation from their  
 22 fungal associates under a high atmospheric [CO<sub>2</sub>] (1,500 ppm) than under a lower [CO<sub>2</sub>] (440  
 23 ppm) (Field et al., 2015a; 2016), with the opposite being the case for liverworts associated  
 24 only with AMF (Field et al., 2012). However, when vascular plant-AMF associations were  
 25 exposed to high [CO<sub>2</sub>] in the same experimental conditions, there were no changes in

1 mycorrhizal-acquired plant P assimilation (Field et al., 2012). Whether vascular plant-MFRE  
2 symbioses respond to changing atmospheric [CO<sub>2</sub>] is completely unknown.

3 Here, using stable and radioisotope tracers, we investigate how MFRE function in  
4 *Lycopodiella inundata*, a homosporous perennial lycophyte widely distributed in the northern  
5 hemisphere (Rasmussen and Lawesson, 2002) that associates only with MFRE fungal  
6 partners, regarding climate change-relevant shifts in atmospheric [CO<sub>2</sub>]. Specifically, we test  
7 the hypotheses that (a) MFRE acquire greater amounts of plant-fixed C under high  
8 atmospheric [CO<sub>2</sub>] of 800 ppm as a result of there being larger amounts of photosynthate  
9 available for transfer because of greater rates of C fixation by the plant via photosynthesis,  
10 and (b), increased C allocation from plant to fungus increases transfer and assimilation of <sup>15</sup>N  
11 and <sup>33</sup>P tracers from MFRE to plants to feed growing plant demand for nutrients to promote  
12 growth.

13

## 14 **Methods**

### 15 **Plant Material and growth conditions**

16 Mature *Lycopodiella inundata* (L.) plants were collected from Thursley National  
17 Nature Reserve, Surrey, UK (SU 90081 39754) in June 2017. The *L. inundata* plants were  
18 planted directly into pots (90 mm diameter x 85 mm depth) containing a homogeneous  
19 mixture of acid-washed silica sand and 5% pot volume compost (No.2; Petersfield) to aid  
20 retention properties of the substrate and to provide minimal nutrients. Soil surrounding plant  
21 roots was left intact to prevent damage to the roots and to act as a natural inoculum, including  
22 symbiotic fungi and associated microorganisms. Pots were weeded regularly to remove other  
23 plant species. All *L. inundata* plants used during this study were collected from the wild.

24 Based on the methods of Field et al., (2012), three windowed cylindrical plastic cores  
25 covered in 10 µm nylon mesh were inserted into the substrate within each experimental pot

(Figure 1a-d). Two of the cores were filled with the same substrate as the bulk soil within the pots, comprising a homogeneous mixture of acid-washed silica sand and compost (No. 2; Petersfield), together making up 95% of the core volume, native soil gathered from around the roots of wild plants to ensure cores contained the same microbial communities as in the bulk soil (4% core volume), and fine-ground tertiary basalt (1% core volume) to act as fungal bait (Field et al. 2015a). The third core was filled with glass wool to allow below-ground gas sampling throughout the  $^{14}\text{C}$ -labelling period to monitor soil community respiration. Plants were watered every other day with distilled water with no other application of nutrient solutions. Microcosms shared a common drip-tray within each cabinet through the acclimation period that ensured a common pool of rhizospheric microorganisms in each microcosm.

A total of 48 *L. inundata* microcosms were maintained in controlled environment chambers (Model no. Micro Clima 1200; Snijders Labs) with a light cycle of 16-h daytime (20°C and 70% humidity) and 8-h night-time (at 15°C and 70% humidity). Day-time photosynthetically active radiation (PAR), supplied by LED lighting, was 225  $\mu\text{mol photons m}^{-2} \text{ s}^{-1}$ . Plants were grown at two contrasting  $\text{CO}_2$  atmospheres; 440 ppm [ $\text{CO}_2$ ] (24 plants) to represent a modern-day atmosphere, or at 800 ppm [ $\text{CO}_2$ ] (24 plants) to simulate Palaeozoic atmospheric conditions on Earth at the time vascular plants are thought to have diverged (Berner, 2006) as well as predicted atmospheric [ $\text{CO}_2$ ] for 2100 (Meinshausen et al., 2011). Atmospheric [ $\text{CO}_2$ ] was monitored using a Vaisala sensor system (Vaisala, Birmingham, UK), maintained through addition of gaseous  $\text{CO}_2$ . All pots were rotated within cabinets to control for possible cabinet and block effects. Plants were acclimated to chamber/growth regimes for four weeks to allow establishment of mycelial networks within pots and confirmed by hyphal extraction from soil and staining with trypan blue (Brundrett et al., 1996). Additionally, roots were stained with acidified ink for the presence of fungi, based on

1 the methods of Brundrett et al., (1996). All plants were processed for molecular analyses of  
2 fungal symbionts within one week of collection using the protocol in Hoysted et al., (2019).

### 3 **Cytological analyses**

4       Roots of experimental *L. inundata* plants were stained with trypan blue (Brundrett et  
5 al., 1996), which is common for identifying MFRE (Orchard et al., 2017b), and photographed  
6 under a Zeiss Axioscope (Zeiss, Oberkochen, Germany) equipped with a MRc digital camera.  
7 To quantify root colonisation by MFRE, five plants were randomly selected per treatment,  
8 and from these two intact, healthy roots (per plant) were excised and sectioned transversally  
9 in up to six segments (depending on root length) before being processed for SEM according  
10 to Duckett et al., (2006). Percentage root colonisation was then calculated by scoring each  
11 segment (from a total of 56 and 58 segments respectively for the elevated and ambient [CO<sub>2</sub>]  
12 treatments) as colonised or non-colonised under the SEM (Figure 4).

13

### 14 **Quantification of C, <sup>33</sup>P and <sup>15</sup>N fluxes between lycophytes and fungi**

15       After the four-week acclimation period, microcosms were moved to individual drip-  
16 trays immediately before isotope labelling to avoid cross-contamination of the isotope  
17 tracers. A total of 100 µl of an aqueous mixture of <sup>33</sup>P-labelled orthophosphate (specific  
18 activity 111 TBq mmol<sup>-1</sup>, 0.3 ng <sup>33</sup>P added; Hartmann analytics) and <sup>15</sup>N-ammonium chloride  
19 (1mg ml<sup>-1</sup>; 0.1 mg <sup>15</sup>N added; Sigma-Aldrich) was introduced into one of the soil-filled mesh  
20 cores in each pot through the installed capillary tube. In half (n = 12) of the pots, cores  
21 containing isotope tracers were left static to preserve direct hyphal connections with the  
22 lycophytes (Fig. 1a). Fungal access to isotope tracers was limited in the remaining half (12)  
23 of the pots by rotating isotope tracer-containing cores through 90°, thereby severing the  
24 hyphal connections between the plants and core soil (Fig. 1b). These were rotated every  
25 second day thereafter, thus providing a control treatment that allows us to distinguish

between fungal and microbial contributions to tracer uptake by plants. Assimilation of  $^{33}\text{P}$  tracer into above-ground plant material was monitored using a hand-held Geiger counter held over the plant material daily.

At detection of peak activity in above-ground plant tissues (21 days after the addition of the  $^{33}\text{P}$  and  $^{15}\text{N}$  tracers), the tops of  $^{33}\text{P}$  and  $^{15}\text{N}$ -labelled cores were sealed with plastic caps and anhydrous lanolin and the glass wool cores were sealed with rubber septa (SubaSeal, Sigma-Aldrich). Before lights were switched on at 8 am, each pot was sealed into a 3.5 L, gas-tight labelling chamber and 2 ml 10% (w/v) lactic acid was added to 30  $\mu\text{l}$   $\text{NaH}^{14}\text{CO}_3$  (specific activity 1.621 GBq/mmol $^{-1}$ ; Hartmann Analytics), releasing a 1.1-MBq pulse of  $^{14}\text{CO}_2$  gas into the headspace of the labelling chamber (Fig. 1c). Pots were maintained under growth chamber conditions, and 1 ml of headspace gas was sampled after 1 hour and every 1.5 hours thereafter. Below-ground respiration was monitored via gas sampling from within the glass-wool filled core after 1 hour and every 1.5 hours thereafter for ~16 h.

## Plant harvest and sample analyses

Upon detection of maximum below-ground flux of  $^{14}\text{C}$ , ~16h after the release of the  $^{14}\text{CO}_2$  pulse, each microcosm compartment (i.e. plant material and soil) was separated, freeze-dried, weighed and homogenised. The  $^{33}\text{P}$  activity in plant and soil samples was quantified by digesting in concentrated  $\text{H}_2\text{SO}_4$  and liquid scintillation (Tricarb 3100TR liquid scintillation analyser, Isotech). The quantity of  $^{33}\text{P}$  tracer that was transferred to plant by its fungal partner was then calculated using previously published equations (Cameron et al. 2007). To determine total symbiotic fungal-acquired  $^{33}\text{P}$  transferred to *L. inundata*, the mean  $^{33}\text{P}$  content of plants that did not have access to the tracer because cores into which the  $^{33}\text{P}$  was introduced were rotated, was subtracted from the total  $^{33}\text{P}$  in each plant that did have

1 access to the isotopes within the core via intact fungal hyphal connections (i.e. static cores).  
 2 This calculation controls for diffusion of isotopes and microbial nutrient cycling in pots,  
 3 ensuring only  $^{33}\text{P}$  gained by the plant via intact fungal hyphal connections is accounted for  
 4 and therefore serves as a conservative measure of the minimum fungal transfer of tracer to  
 5 the plant.

6 Between two and four mg of freeze-dried, homogenised plant tissue was weighed into  
 7  $6 \times 4 \text{ mm}^2$  tin capsules (Sercon) and  $^{15}\text{N}$  abundance was determined using a continuous flow  
 8 IRMS (PDZ 2020 IRMS, Sercon). Air was used as the reference standard, and the IRMS  
 9 detector was regularly calibrated to commercially available reference gases. The  $^{15}\text{N}$   
 10 transferred from fungus to plant was then calculated using equations published previously in  
 11 Field et al., (2016). In a similar manner as for the  $^{33}\text{P}$ , the mean of the total  $^{15}\text{N}$  in plants  
 12 without access to the isotope because of broken hyphal connections between plant and core  
 13 contents was subtracted from total  $^{15}\text{N}$  in each plant with intact hyphal connections to the  
 14 mesh-covered core to give fungal acquired  $^{15}\text{N}$ . Again, this provides a conservative measure  
 15 of  $^{15}\text{N}$  transfer from fungus to plant as it ensures only  $^{15}\text{N}$  gained by the plant via intact fungal  
 16 hyphal connections is accounted for.

17 The  $^{14}\text{C}$  activity of plant and soil samples was quantified through sample oxidation  
 18 (307 Packard Sample Oxidiser, Isotech) followed by liquid scintillation. Total C ( $^{12}\text{C} + ^{14}\text{C}$ )  
 19 fixed by the plant and transferred to the fungal network was calculated as a function of the  
 20 total volume and  $\text{CO}_2$  content of the labelling chamber and the proportion of the supplied  
 21  $^{14}\text{CO}_2$  label fixed by plants. The difference in total C between the values obtained for static  
 22 and rotated core contents in each pot is considered equivalent to the total C transferred from  
 23 plant to symbiotic fungus within the soil core for that microcosm, noting that a small  
 24 proportion will be lost through soil microbial respiration. The total C budget for each  
 25 experimental pot was calculated using equations from Cameron et al., (2006). Total percent

allocation of plant-fixed C to extra-radical symbiotic fungal hyphae was calculated by subtracting the activity (in Becquerels (Bq)) of rotated core samples from that detected in static core samples in each pot, dividing this by the sum of activity detected in all components of each microcosm, then multiplying it by 100.

## Statistics

Effects of plant species, [CO<sub>2</sub>] and the interaction between these factors on the C, <sup>33</sup>P and <sup>15</sup>N fluxes between plants and Mucoromycotina FRE fungi were tested using analysis of variance (ANOVA) or Mann-Whitney U where indicated. Data were checked for homogeneity and normality. Where assumptions for ANOVA were not met, data were transformed using log<sub>10</sub>. If assumptions for ANOVA were still not met, a Mann-Whitney U as well as a Kruskal-Wallis statistical test was performed. All statistics were carried out using the statistical software package SPSS Version 24 (IBM Analytics).

## Results

### Molecular identification of fungal symbionts

Analysis of experimental *Lycopodiella inundata* plants grown under ambient and elevated [CO<sub>2</sub>] confirmed that they were colonised by Mucoromycotina fine root endophyte fungi. Glomeromycotina fungal sequences were not detected. Mucoromycotina OTUs that have previously been identified in wild-collected lycophytes from diverse locations (Rimington et al., 2015; Hoysted et al., 2019), were detected before and after the experiments. (GenBank/EMBL accession numbers: MK673773-MK673803).

### Cytology of fungal colonisation in plants

1 Trypan blue staining and SEM of *L. inundata* roots grown under ambient and elevated  
2 atmospheric [CO<sub>2</sub>] revealed the same fungal symbiont morphology consistent with that  
3 previously observed for *L. inundata*-Mucoromycotina FRE (Hoysted et al., 2019) and MFRE  
4 colonisation in other vascular plants (Orchard et al., 2017a) including fine branching, aseptate  
5 hyphae (<2 µm diameter) with small intercalary and terminal swellings/vesicles (usually 5-10  
6 but up to 15 µm diameter) but, differently from those in flowering plants, no arbuscules.  
7 While no differences were detected in the cytology of colonisation between the roots of  
8 plants grown under contrasting atmospheric [CO<sub>2</sub>], those grown under 800 ppm [CO<sub>2</sub>]  
9 showed higher percentage colonisation (79%) than those grown under 440 ppm [CO<sub>2</sub>] (53%).  
10

#### 11 **C transfer from *L. inundata* to MFRE symbionts**

12 The amount of carbon allocated from *L. inundata* to Mucoromycotina FRE fungi  
13 under elevated atmospheric [CO<sub>2</sub>] concentrations compared to that when plants were grown  
14 under atmospheric [CO<sub>2</sub>] of 440 ppm was greater, with *L. inundata* allocating 2.8 times more  
15 recent photosynthate to MFRE fungi in elevated atmospheric [CO<sub>2</sub>] compared with ambient  
16 atmospheric [CO<sub>2</sub>], although this was not statistically significant (Figure 2a; Mann-Whitney  
17 U = 194, P = 0.864, n = 24). In terms of total C transferred from plants to MFRE, a similar  
18 trend was observed with *L. inundata* transferring ca. 2.7 times more C to MFRE fungal  
19 partners at elevated atmospheric [CO<sub>2</sub>] concentrations of 800 ppm compared to those  
20 maintained under atmospheric [CO<sub>2</sub>] of 440 ppm (Figure 2b; Mann-Whitney U = 197.5, P =  
21 0.942, n = 24).  
22

#### 23 **Fungus-to-lycophyte <sup>33</sup>P and <sup>15</sup>N transfer**

24 Mucoromycotina FRE transferred both <sup>33</sup>P and <sup>15</sup>N to *L. inundata* in both atmospheric  
25 CO<sub>2</sub> treatments (Figure 3). There were no significant differences in the amounts of either <sup>33</sup>P

1 or  $^{15}\text{N}$  tracer acquired by MFRE in *L. inundata* plant tissue when grown under elevated  $[\text{CO}_2]$   
2 of 800 ppm compared to plants grown under  $[\text{CO}_2]$  conditions of 440 ppm, either in terms of  
3 absolute quantities (Figure 3a; ANOVA [ $F_{1, 23} = 0.009$ ,  $P = 0.924$ ,  $N = 10$ ]; Figure 3c;  
4 ANOVA [ $F_{1, 22} = 0.126$ ,  $P = 0.726$ ,  $n = 10$ ]) or when normalised to plant biomass (Figure 3b;  
5 ANOVA [ $F_{1, 23} = 0.085$ ,  $P = 0.774$ ,  $n = 10$ ]; Figure 3d; ANOVA [ $F_{1, 22} = 0.770$ ,  $P = 0.390$ ,  $n$   
6  $= 10$ ]). Although not significantly different, there was a trend of more nitrogen transferred  
7 between MFRE under ambient  $[\text{CO}_2]$  compared to elevated  $[\text{CO}_2]$  (Figure 3d). Within the  
8 experimental microcosms, MFRE transferred 6.65% ( $\pm 2.55$ )  $^{33}\text{P}$  and 0.07% ( $\pm 0.02$ )  $^{15}\text{N}$   
9 tracer under ambient  $[\text{CO}_2]$  and 6.9% ( $\pm 4.75$ )  $^{33}\text{P}$  and 0.03% ( $\pm 0.18$ )  $^{15}\text{N}$  tracer under  
10 elevated  $[\text{CO}_2]$ .

11

## 12 Discussion

13 Our results demonstrate for the first time, that the exchange of C-for-nutrients  
14 between a vascular plant and MFRE symbionts is largely unaffected by changes in  
15 atmospheric  $[\text{CO}_2]$ , with MFRE maintaining  $^{33}\text{P}$  and  $^{15}\text{N}$  assimilation and transfer to the plant  
16 host across  $[\text{CO}_2]$  treatments (Fig. 3a, b), despite MFRE colonisation being more abundant  
17 within the roots of plants grown under the elevated  $[\text{CO}_2]$  atmosphere. In our experiments,  
18 *Lycopodiella inundata* allocated ca. 2.8 times more photosynthate to MFRE under elevated  
19  $a[\text{CO}_2]$  compared with plants that were grown under ambient  $a[\text{CO}_2]$  (Fig. 2a, b), but without  
20 a reciprocal increase in fungal-acquired  $^{33}\text{P}$  or  $^{15}\text{N}$  tracer assimilation. Although the  
21 difference in C transfer between plants under different  $[\text{CO}_2]$  atmospheres was not  
22 statistically significant, the trend observed is in line with previous studies where  
23 Mucoromycotina fungi (and both Mucoromycotina and AMF partners co-colonising the same  
24 host in ‘dual’ symbiosis) fungi gained a greater proportion of recently fixed photosynthates  
25 from their non-vascular plant partners, but did not deliver greater amounts of  $^{33}\text{P}$  or  $^{15}\text{N}$

1 tracers when grown under an elevated  $a[CO_2]$  compared to current ambient conditions (Field  
2 et al., 2012, 2015a, 2016). This contrasts with patterns of carbon-for-nutrient exchange  
3 between other vascular plants and AMF symbionts where increased allocation of carbon to  
4 fungal symbionts is usually associated with increases in nutrient delivery from AMF to the  
5 host plant (Kiers et al., 2011; Wipf et al., 2019). Such variances may be partly explained by  
6 the different lifestyles of the partially saprotrophic Mucoromycotina and the strictly  
7 biotrophic Glomeromycotina (Field et al., 2015b, 2016; Field and Pressel, 2018) therefore  
8 conventional ‘rules’ governing AMF-plant symbioses may not necessarily apply to  
9 Mucoromycotina-plant symbioses. It is possible that when atmospheric  $[CO_2]$  is high,  
10 liverworts and relatively simple vascular plants such as *L. inundata* produce photosynthates  
11 that they are unable to utilise effectively for growth or reproduction as they possess no or  
12 limited vasculature and specialised storage organs to provide transport and storage of excess  
13 carbohydrates (Kenrick and Crane, 1997). As a consequence, surplus photosynthates may be  
14 either stored as insoluble starch granules, transferred directly to mycobionts (Field et al.,  
15 2016), or released into surrounding soil as exudates (Galloway et al., 2017). By moving  
16 excess photosynthates into mycobionts, competition for soil resources, space and potential  
17 pathogenicity from surrounding saprotrophic organisms such as bacteria and fungi may be  
18 reduced (Field et al., 2016).

19 Additionally, biomass of mycorrhizal fungi may increase in response to elevated  
20  $a[CO_2]$  but this increase does not necessarily result in greater nutrient transfer to the host  
21 plant (Alberton et al., 2005), instead inducing a negative feedback through enhanced  
22 competition for nutrients between symbiotic partners (Fransson et al., 2007). Studies on  
23 ectomycorrhizal fungi, another group of widespread symbiotic fungi with plants that may act  
24 as facultative saprotrophs, showed that despite an increase in the amount of extraradical  
25 hyphae under elevated  $[CO_2]$ , there was no corresponding enhanced transfer of N to the host,

1 suggesting that the fungus had become a larger sink of nutrients (Fransson et al., 2005).  
 2 While we did not measure fungal biomass in this study, our observation of greater percentage  
 3 colonisation in the roots of *Lycopodiella* plants grown under an elevated [CO<sub>2</sub>] of 800 ppm  
 4 compared to those grown under ambient concentrations but with no corresponding increase in  
 5 fungus-to-plant N and P transfer may suggest a similar possible scenario.

6 In Field et al. (2015a; 2016), the liverworts *Haplomitrium gibbsiae* and *Treubia*  
 7 *lacunosa* transferred approximately 56 and 189 times less photosynthate, respectively, to  
 8 their MFRE partners under elevated a[CO<sub>2</sub>] than the *L. inundata* in our experiments did –  
 9 although Field et al.'s (2016) experiments were carried out at higher a[CO<sub>2</sub>] (1,500 ppm) than  
 10 the present study (800 ppm). Given that *L. inundata* can regulate and maintain CO<sub>2</sub>  
 11 assimilation and thus C fixation through stomata and vasculature (Kenrick and Crane, 1997),  
 12 it is possible that [CO<sub>2</sub>] would affect rates of C fixation and subsequent transfer of plant C to  
 13 symbiotic fungi less than it might do in poikilohydric liverworts. Our results are consistent  
 14 with previous studies of AMF symbiosis showing that vascular plants associating with AMF  
 15 transferred more C to their fungal partners compared to non-vascular species (Field et al.,  
 16 2012). As such, our findings add to mounting evidence that C transfer from plant to fungus  
 17 responds differently to changing atmospheric [CO<sub>2</sub>] according to both plant and fungal  
 18 identity.

19 We observed no difference in the amount of fungal-acquired <sup>33</sup>P tracer transferred to  
 20 *L. inundata* sporophytes between atmospheric [CO<sub>2</sub>] treatments. This aligns with the  
 21 responses of MFRE symbionts in non-vascular liverworts which also transferred the same  
 22 amount (or more in the case of *Treubia* mycobionts) of <sup>33</sup>P and more <sup>15</sup>N to plant hosts under  
 23 ambient atmospheric [CO<sub>2</sub>] compared to elevated [CO<sub>2</sub>] (Field et al., 2015a; 2016). The  
 24 amount of <sup>33</sup>P transferred to *L. inundata* was much less than has previously been recorded  
 25 for Mucoromycotina in liverworts (Field et al., 2016) and for Glomeromycotina-associated

1 ferns and angiosperms (Field et al., 2012), despite the same amount of  $^{33}\text{P}$  being made  
 2 available, indicating that MFRE fungi do not play a critical role in lycophyte P nutrition.  
 3 MFRE transferred considerable amounts of  $^{15}\text{N}$  to their host (see also Hoysted et al., 2019),  
 4 under both  $[\text{CO}_2]$  treatments. This observation together with previous findings that MFRE  
 5 fungi facilitate the transfer of both organic and inorganic  $^{15}\text{N}$  to non-vascular liverworts  
 6 suggest that MFRE may play a complementary role to AMF in plant nutrition, with a more  
 7 prominent role in N assimilation (Field et al., 2019; Hoysted et al., 2019). While it has been  
 8 shown that AMF can transfer N to their associated host (Ames et al., 1983; Hodge et al.,  
 9 2001) significant doubts remain as to the ecological relevance of an AMF-N uptake pathway  
 10 (see Read 1991; Smith and Smith, 2011). In particular, regarding the exact mechanism of N  
 11 transfer and, more importantly, the amounts of N transferred via the AMF compared to the N  
 12 requirements of the plant remain highly equivocal (Smith and Smith, 2011). This murky view  
 13 of AMF in N transfer, coupled with recent molecular re-identification of fine root endophytes  
 14 as belonging within Mucoromycotina and not Glomeromycotina (Orchard et al., 2017a) and  
 15 evidence pointing to a significant role of MFRE in  $^{15}\text{N}$  transfer to both non-vascular (Field et  
 16 al., 2015a; 2016; 2019) and vascular plants (Hoysted et al., 2019) suggest that effects in plant  
 17 N nutrition previously ascribed to AMF may instead be attributed to co-occurring MFRE  
 18 (Field et al., 2019).

19       Given that symbioses involving Mucoromycotina FRE fungi are much more  
 20 widespread than were initially thought, covering a wide variety of habitats (Bidartondo et al.,  
 21 2011; Rimington et al., 2015, 2020; Orchard et al., 2017a, b, c; Hoysted et al., 2018; 2019),  
 22 their role in plant N nutrition and responses to high  $[\text{CO}_2]$  may have much broader ecological  
 23 significance than previously assumed. It remains critical that we test how mycorrhizal  
 24 plasticity (both AMF and FRE) translates into function in order to understand how climate  
 25 change may affect nutrient fluxes between symbionts in the past, present and, importantly,

the future (Field and Pressel, 2018). With the growing interest in the application of mycorrhizal fungi to improve vascular plant community diversity, increasing MFRE in soils alongside AMF may improve host nutrient capture and ecosystem robustness, including conservation of endangered species, such as *L. inundata*, in the face of global climate change (van der Heijden et al., 1998; 2015).

In this study, we provide a first assessment of the effects of varying [CO<sub>2</sub>] on carbon-for-nutrient exchanges between MFRE and a vascular plant. Our results point to important differences in responses to changing [CO<sub>2</sub>] between MFRE and AMF and between MFRE symbioses in vascular vs. non-vascular plants, however they are restricted to one, early diverging, vascular species, generally growing in severely N-limited habitats. It is now critical that similar investigations are extended to a broader range of taxa, including flowering plants known to engage in symbiosis with both MFRE and AMF. In doing so, efforts towards the potential exploitation of these symbiotic fungi to help meet sustainability targets of the future may be better informed and the likelihood of success vastly improved.

## Acknowledgements

We gratefully acknowledge support from the NERC to KJF, SP (NE/N00941X/1; NE/S009663/1) and MIB (NE/N009665/1). KJF is funded by a BBSRC Translational Fellowship (BB/M026825/1) and a Philip Leverhulme Prize (PLP-2017-079). We thank Natural England for granting permission to collect *Lycopodiella* from Thursley.

## Literature Cited

Alberton O, Kuyper TW, Gorissen A. 2005. Taking mycocentrism seriously: mycorrhizal fungal and plant responses to elevated CO<sub>2</sub>. *New Phytologist*, 167: 859-868.

1 Ames RN, Reid CPP, Poter LK, Cambardella C. 1983. Hyphal uptake and transport of  
2 nitrogen from two <sup>15</sup>N-labelled sources by *Glomus mosseae*, a vesicular-arbuscular  
3 mycorrhizal fungus. *New Phytologist*, 95(3), 381-396.

4

5 Berbee ML, James TY, Strullu-Derrien C. 2017. Early diverging fungi: diversity and impact  
6 at the dawn of terrestrial life. *Annual Review of Microbiology*, 71.

7

8 Berner RA. 2006. Geocarbsulf: A combined model for Phanerozoic atmospheric O<sub>2</sub> and CO<sub>2</sub>.  
9 *Geochimica et Cosmochimica Acta*, 70: 5653-5664.

10

11 Bergman NM, Lenton TM, Watson AJ. 2004. COPSE: a new model of biogeochemical  
12 cycling over Phanerozoic time. *American Journal of Science*, 304: 397-437.

13 Bidartondo MI, Read DJ, Trappe JM, Merckx V, Ligrone R, Duckett JG. 2011. The dawn of  
14 symbiosis between plants and fungi. *Biology Letters*, 7(4): 574-577.

15

16 Blair JE. 2009. The fungi in the timetree of life. Hedges SB & Kumar S. eds.

17

18 Brundrett M, Bougher N, Dell B, Grove T, Malajczuk N. 1996. Working with mycorrhizas in  
19 forestry and agriculture. Monograph, Australian Centre for International Agricultural  
20 Research. Pirie Printers, Canberra.

21

22 Cameron DD, Leake JR, Read DJ. 2006. Mutualistic mycorrhiza in orchids: evidence from  
23 plant-fungus carbon and nitrogen transfers in the green-leaved terrestrial orchid *Goodyera*  
24 *repens*. *New Phytologist*, 171: 405-416.

25

- 1 Cameron DD, Johnson I, Leake JR, Read DJ. 2007. Mycorrhizal acquisition of inorganic  
2 phosphorus by the green-leaved terrestrial orchid *Goodyera repens*. *Annals of Botany*, 99(5):  
3 831-834.  
4
- 5 Cotton TA. 2018. Arbuscular mycorrhizal fungal communities and global change. An  
6 uncertain future. *FEMS microbiology ecology*, 94(11): 179.  
7
- 8 Desirò A, Duckett JG, Pressel S, Villarreal JC, Bidartondo MI. 2014. Fungal symbioses in  
9 hornworts: a chequered history. *Proceedings of the Royal Society B: Biological Sciences*,  
10 280(1759): 20130207.  
11
- 12 Duckett JG, Carafa A, Ligrone R. 2006. A highly differentiated glomeromycotan association  
13 with the mucilage-secreting, primitive antipodean liverwort *Treubia* (Treubiaceae): Clues to  
14 the origins of mycorrhizas. *American Journal of Botany*, 93: 797-813.  
15
- 16 Field KJ, Cameron DD, Leake JR, Tille S, Bidartondo MI, Beerling DJ. 2012. Contrasting  
17 arbuscular mycorrhizal responses of vascular and non-vascular plants to a simulated  
18 Palaeozoic CO<sub>2</sub> decline. *Nature Communications*, 3:1-8.  
19
- 20 Field KJ, Rimington WR, Bidartondo MI, Allinson KE, Beerling DJ, Cameron DD, *et al.*  
21 2015a. First evidence of mutualism between ancient plant lineages (Haplomitropsida  
22 liverworts) and Mucoromycotina fungi and its response to simulated Palaeozoic changes in  
23 atmospheric CO<sub>2</sub>. *New Phytologist*, 205(2): 743-756.  
24

- 1 Field KJ, Pressel S Duckett JG, Rimington WR, Bidartondo MI. 2015b. Symbiotic options  
2 for the conquest of land. *Trends in Ecology and Evolution*, 30(8): 477-486.
- 3
- 4 Field KJ, Rimington WR, Bidartondo MI, Allinson KE, Beerling DJ, Cameron DD, *et al.*  
5 2016. Functional analysis of liverworts in dual symbiosis with Glomeromycota and  
6 Mucoromycotina fungi under simulated Palaeozoic CO<sub>2</sub> decline. *The ISME Journal*, 10(6):  
7 1514-1526.
- 8
- 9 Field KJ, Pressel S. 2018. Unity in diversity: structural and functional insights into the  
10 ancient partnerships between plants and fungi. *New Phytologist*, 220(4): 996-1011.
- 11
- 12 Field KJ, Bidartondo MI, Rimington WR, Hoysted GA, Beerling D, Cameron DD, *et al.*  
13 2019. Functional complementarity of ancient plant-fungal mutualisms: contrasting nitrogen,  
14 phosphorus and carbon exchanges between Mucoromycotina and Glomeromycotina fungal  
15 symbionts of liverworts. *New Phytologist*, 223(2): 908-921.
- 16
- 17 Field KJ, Daniell T, Johnson D, Helgason T. 2020. Mycorrhizas for a changing world:  
18 sustainability, conservation, and society. *Plants, People, Planet*, 2(2): 98-103.
- 19
- 20 Fransson FMA, Taylor AFS, Finlay RD. 2005. Mycelial production, spread and root  
21 colonisation by ectomycorrhizal fungi *Hebeloma crustuliniforme* and *Paxillus involutus*  
22 under elevated atmospheric CO<sub>2</sub>. *Mycorrhiza*, 15: 25-31.
- 23
- 24 Fransson FMA, Anderson IC, Alexander IJ. 2007. Ectomycorrhizal fungi in culture respond  
25 differently to increased carbon availability. *FEMS Microbiology Ecology*, 61: 246-257.

1

2 Galloway AF, Pederson MJ, Merry B, Marcus SE, Blacker J, Benning LG, *et al.* 2018.

3 Xyloglucan is released by plants and promotes soil particle aggregation. *New Phytologist*,

4 217(3): 1128-1136.

5

6 Gavito ME, Schweiger P, Jakobsen I. 2003. P uptake by arbuscular mycorrhizal hyphae:

7 effect of soil temperature and atmospheric CO<sub>2</sub> enrichment. *Global Change Biology*, 9(1):

8 106-116.

9

10 Hodge, A, Campbell CD, Fitter AH. 2001. An arbuscular mycorrhizal fungus accelerates

11 decomposition and acquires nitrogen directly from organic material. *Nature*, 413(6853): 297-

12 299.

13

14 Hoysted GA, Kowal J, Jacob, A, Rimington WR, Duckett JG, Pressel S, *et al.* 2018. A

15 mycorrhizal revolution. *Current Opinion in Plant Biology*, 44: 1-6.

16

17 Hoysted GA, Jacob A, Kowal J, Giesemann P, Bidartondo MI, Duckett JG, *et al.* 2019.

18 Mucoromycotina fine root endophyte fungi form nutritional mutualisms with vascular plants.

19 *Plant Physiology*, 181(2): 565-577.

20

21 Kenrick P, Crane PR. 1997. Origin and early diversification of land plants. Smithsonian

22 Institution Press.

23

1 Kiers ET, Duhamel M, Beesetty Y, Mensah JA, Franken O, Verbruggen E, *et al.* 2011.  
2 Reciprocal rewards stabilise cooperation in the mycorrhizal symbiosis. *Science*, 333(6044):  
3 880-882.  
4  
5 Krings M, Taylor TN, Dotzler N. 2012. Fungal endophytes as a driving force in land plant  
6 evolution: evidence from the fossil record. *Biocomplexity of plant-fungal interactions*: 5-28.  
7  
8 Leake J, Johnson D, Donnelly D, Muckle G, Boddy L, Read D. 2004. Networks of power and  
9 influence: the role of mycorrhizal mycelium in controlling plant communities and  
10 agroecosystem functioning. *Canadian Journal of Botany*, 82(8): 1016-1045.  
11  
12 Leaky AD, Lau JA. 2012. Evolutionary context for understanding and manipulating plant  
13 responses to past, present and future atmospheric [CO<sub>2</sub>]. *Philosophical Transactions of the*  
14 *Royal Society B: Biological Sciences*, 367(1588): 613-629.  
15  
16 Lenton TM, Dahl TW, Daines SJ, Mills BJW, Ozaki K, Saltzman MR, *et al.* 2016. Earliest  
17 land plants created modern levels of atmospheric oxygen. *Proceedings of the National*  
18 *Academy of Sciences, USA*, 113: 9704-9709.  
19  
20 Meinshausen M, Smith SJ, Calvin K, Daniel JS, Kainuma MLT, Lamarque JF, *et al.* 2011.  
21 The RCP greenhouse gas concentrations and their extensions from 1765 to 2300. *Climatic*  
22 *Change*, 109(1-2): 213.  
23

- 1 Morris JL, Puttick MN, Clark JW, Edwards D, Kenrick P, Pressel S, *et al.* 2018. The  
2 timescale of early land plant evolution. *Proceedings of the National Academy of Sciences*,  
3 115(10): 2274-2283.  
4
- 5 Nicolson TH. 1967. Vesicular-arbuscular mycorrhiza – a universal plant symbiosis. *Science*  
6 *Progress*, (1933-): 561-581.  
7
- 8 Orchard S, Hilton S, Bending GD, Dickie IA, Standish RJ, Gleeson DB, *et al.* 2017a. Fine  
9 endophytes (*Glomus tenue*) are related to Mucoromycotina, not Glomeromycota. *New*  
10 *Phytologist*, 213(2): 481-486.  
11
- 12 Orchard, S, Standish RJ, Dickie IA, Renton M, Walker C, Moot D, *et al.* 2017b. Fine root  
13 endophytes under scrutiny: a review of the literature on arbuscular-producing fungi recently  
14 suggested to belong to the Mucoromycotina. *Mycorrhiza*, 27(7): 619-638.  
15
- 16 Orchard S, Standish RJ, Nicol D, Dickie IA, Ryan MH. 2017c. Sample storage conditions  
17 alter colonisation structures of arbuscular mycorrhizal fungi and, particularly fine root  
18 endophyte. *Plant and Soil*, 412(1-2): 35-42.  
19
- 20 Pirozynski KA, Malloch DW. 1975. The origin of land plants: a matter of mycoheterotrophy.  
21 *Biosystems*, 6: 153-164.  
22
- 23 Radhakrishnan GV, Keller J, Rich MK, Vernié T, Mbadinga DLM, Vigneron N, *et al.* 2020.  
24 An Ancestral signalling pathway is conserved in intracellular symbioses-forming plant  
25 lineages. *Nature Plants*, 6(3): 280-289.

1

2 Rasmussen KK, Lawesson JE. 2002. *Lycopodiella inundata* in British plant communities and

3 reasons for its decline. *Watsonia*, 24(1): 45-56.

4

5 Read DJ. 1991. Mycorrhizas in ecosystems. *Experientia*, 47(4): 376-391.

6

7 Redecker D. 2000. Specific PCR primers to identify arbuscular mycorrhizal fungi with

8 colonised roots. *Mycorrhiza*, 10(2): 73-80.

9

10 Rillig MC. 2004. Arbuscular mycorrhizae and terrestrial ecosystem processes. *Ecology*

11 *Letters*, 7(8): 740-754.

12

13 Rimington WR, Pressel S, Duckett JG, Bidartondo MI. 2015. Fungal associations of basal

14 vascular plants: reopening a closed book? *The New Phytologist*, 205(4): 1394.

15

16 Rimington WR, Duckett JG, Field KJ, Bidartondo M, Pressel S. 2020. The distribution and

17 evolution of fungal symbioses in ancient lineages of land plants. *Mycorrhiza*, 1-27.

18

19 Smith SE, Smith FA. 2011. Roles of arbuscular mycorrhizas in plant nutrition and growth:

20 new paradigms from cellular to ecosystem scales. *Annual Review of Plant Biology*, 62: 227-

21 250.

22

23 Spatafora JW, Aime MC, Grigoriev IV, Martin F, Stajich JE, Blackwell M. The fungal tree of

24 life: from molecular systematics to genome-scale phylogenies. *Microbiology Spectrum*, 5(5):

25 1-32.

1

2 Strullu-Derrien C, Kenrick P, Pressel S, Duckett JG, Rioult JP, Strullu DG. 2014. Fungal  
3 associaions in *Horneophyton ligneri* from the Rynie Chert (c. 407 million years old) closely  
4 resemble those in extant lower land plants: novel insights into ancestral plant-fungus  
5 symbioses. *New Phytologist*, 203(3): 964-979.

6

7 Thirkell TJ, Pastok D, Field KJ. 2019. Carbon for nutrient exchange between arbuscular  
8 mycorrhizal fungi and wheat varies according to cultivar and changes in atmospheric carbon  
9 dioxide concentration. *Global Change Biology*, 26(3), 1725-1738.

10

11 van der Heijden MG, Klironomos JN, Ursic M, Moutoglis P, Streitwolf-Engel R, Boller T, *et*  
12 *al.* 1998. Mycorrhizal fungal diversity determines plant biodiversity, ecosystem variability  
13 and productivity. *Nature*, 396(6706): 69-72.

14

15 Van der Heijden MG, Martin FM, Selosse MA, Sanders IR. 2015. mycorrhizal ecology and  
16 evolution: the past, the present, and the future. *New Phytologist*, 205(4): 1406-1423.

17 Wijayawardene NN, Pawłowska J, Letcher PM, Kirk PM, Humber RA, Schüßler A, *et al.*  
18 2018. Notes for genera: basal clades of Fungi (including Aphelidiomycota,  
19 Basidiobolomycota, Blastocladiomycota, Calcarisporiellomycota, Caulochytriomycota,  
20 Chytridiomycota, Entomophthoromycota, Glomeromycota, Kickxellomycota,  
21 Monoblepharomycota, Mortierellomycota, Mucoromycota, Neocallimastigomycota,  
22 Olpidiomycota, Rozellomycota and Zoopagomycota). *Fungal diversity*, 92(1): 43-129.

23

1 Wipf D, Krajinski F, van Tuinen D, Recorbet G, Courty PE. 2019. Trading on the arbuscular  
2 mycorrhiza market: from arbuscules to common mycorrhizal networks. *New Phytologist*,  
3 223(3): 1127-1142.

4

5 Zheng C, Ji B, Zhang J, Zhang F, Bever JD. 2015. Shading decreases plant carbon  
6 preferential allocation towards the most beneficial mycorrhizal mutualist. *New Phytologist*,  
7 205(1): 361-368.

8

# 9 **Figure Captions:**

10 **Figure 1.** Schematic diagram and photograph of radio and stable isotope tracing system in a  
11 lycophyte. (a) Microcosm containing static core in which  $^{33}\text{P}$  and  $^{15}\text{N}$  was injected; (b)  
12 Microcosm containing rotated core in which  $^{33}\text{P}$  and  $^{15}\text{N}$  was injected; (c) Microcosm set-up  
13 enclosed in an air-tight container in which  $^{14}\text{C}$  isotope tracing was conducted and (d)  
14 Photograph of *Lycopodiella inundata*-MFRE radio- and stable isotope tracing experimental  
15 system.

16

17 **Figure 2.** Carbon exchange between *Lycopodiella inundata* and Mucoromycotina fine root  
18 endophyte fungi (MFRE). (a) % allocation of plant-fixed C to MFRE; (b) Total plant-fixed C  
19 transferred to Mucoromycotina FRE by *L. inundata*. All experiments conducted at a[CO<sub>2</sub>]  
20 of 800 p.p.m. (grey bars) and 440 p.p.m. (white bars). All bars in each panel represent the  
21 difference in isotopes between the static and rotated cores inserted into each microcosm. In  
22 all panels, error bars denote SEM. In panels (a)-(b)  $n = 24$  for both 800 p.p.m and 440 p.p.m  
23 a[CO<sub>2</sub>].

24

**Figure 3.** Fungal acquired nutrients by Mucoromycotina fine root endophyte (MFRE) fungi and total shoot nutrients in above ground plant tissue of *L. inundata*. (a) Total plant tissue  $^{33}\text{P}$  content (ng) and (b) total plant tissue  $^{15}\text{N}$  content (ng) in *L. inundata* tissue; (c) tissue concentration (ng g $^{-1}$ ) of fungal-acquired  $^{33}\text{P}$  and (d) tissue concentration of  $^{15}\text{N}$  (ng g $^{-1}$ ) in shoot tissue of *L. inundata*; (e) Total shoot P content (mg) equating to both plant and fungal acquired P and (f) total shoot N content (mg) equating to both plant and fungal acquired N in shoots of *L. inundata*. All experiments conducted at a[CO $_2$ ] of 800 p.p.m. (grey bars) and 440 p.p.m. (white bars). All bars in each panel (a-d) represent the difference in isotopes between the static and rotated cores inserted into each microcosm. In all panels, error bars denote SEM. In panels (a)-(d)  $n = 12$  and panels (e)-(f)  $n = 24$  for both 800 p.p.m and 440 p.p.m a[CO $_2$ ].

**Figure 4.** Experimental *Lycopodiella* roots colonised by MFRE. a) Light micrographs of trypan blue stained roots showing fine branching hyphae with intercalary and terminal small vesicles (see insert). b) Scanning electron micrograph of transverse section of root showing abundant branching hyphae (\*) and vesicles (arrowed). SEMs at this magnification (x150) were used to quantify % colonisation of roots of experimental plants grown under the two contrasting atmospheric [CO $_2$ ] regimes, shown here in a plant grown under the elevated a[CO $_2$ ] of 800 p.p.m. Scale bars: a) (and (a) insert) 50  $\mu\text{m}$ ; b) 100  $\mu\text{m}$ .

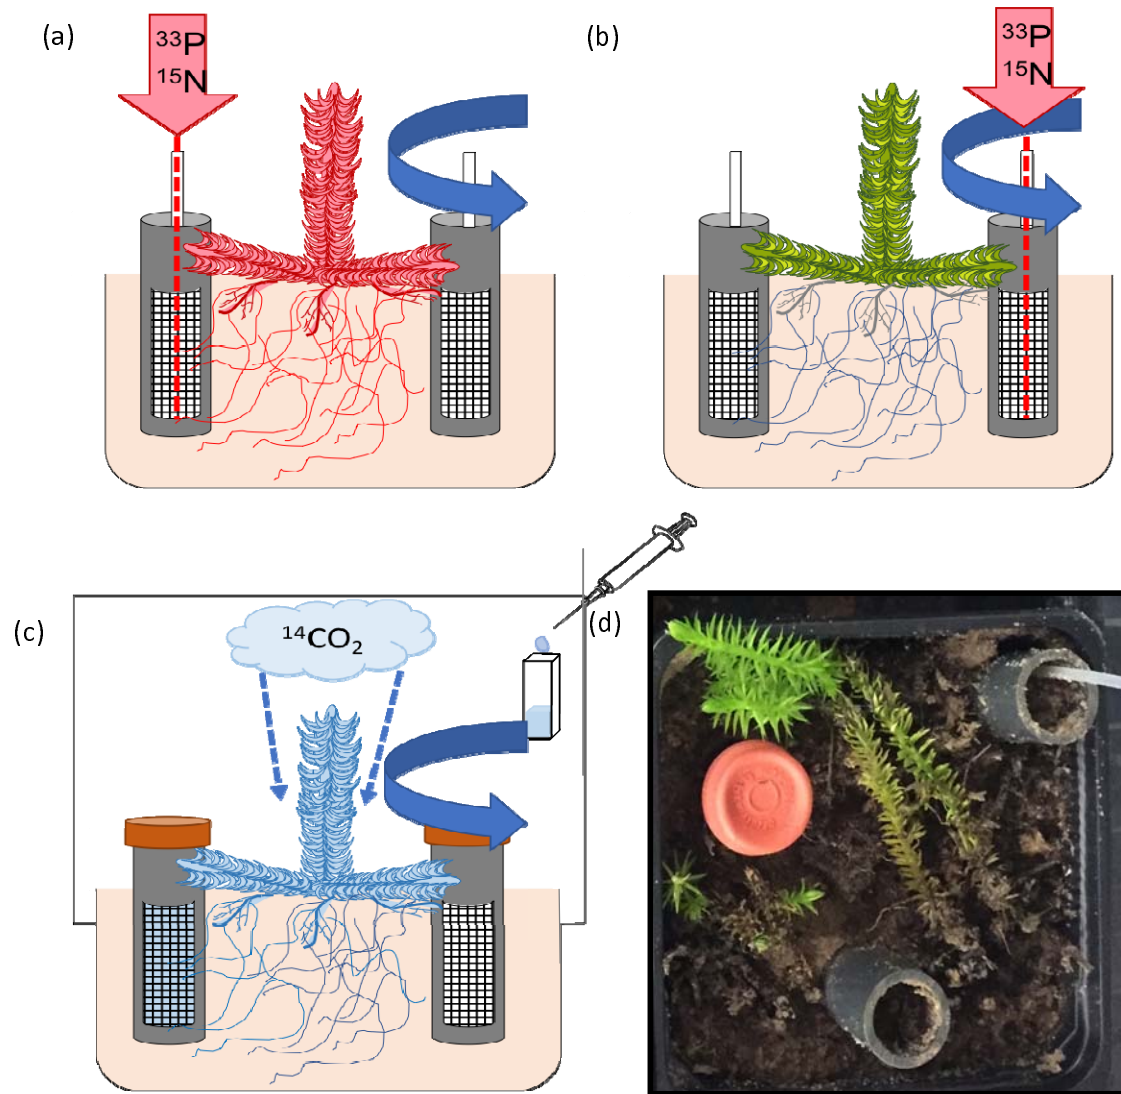

**Figure 1.** Schematic diagram and photograph of radio and stable isotope tracing system in a lycophyte. (a) Microcosm containing static core in which  $^{33}\text{P}$  and  $^{15}\text{N}$  was injected; (b) Microcosm containing rotated core in which  $^{33}\text{P}$  and  $^{15}\text{N}$  was injected; (c) Microcosm set-up enclosed in an air-tight container in which  $^{14}\text{C}$  isotope tracing was conducted and (d) Photograph of *Lycopodiella inundata*-MFRE radio- and stable isotope tracing experimental

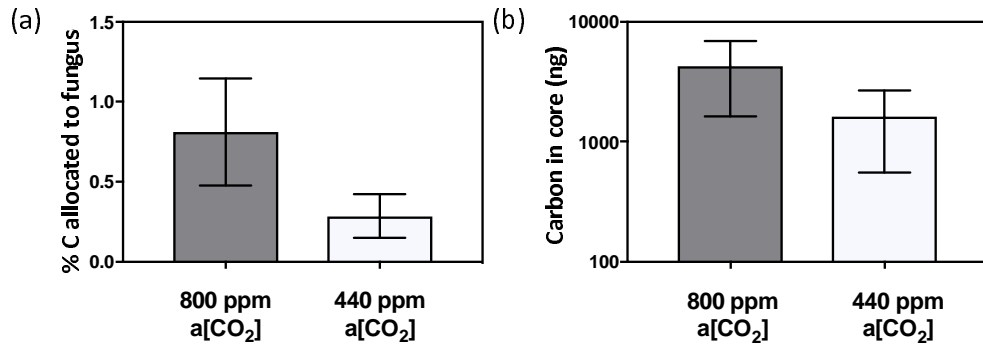

**Figure 2.** Carbon exchange between *Lycopodiella inundata* and Mucoromycotina fine root endophyte fungi (MFRE). (a) % allocation of plant-fixed C to MFRE; (b) Total plant-fixed C transferred to Mucoromycotina FRE by *L. inundata*. All experiments conducted at a[CO<sub>2</sub>] of 800 p.p.m. (grey bars) and 440 p.p.m. (white bars). All bars in each panel represent the difference in isotopes between the static and rotated cores inserted into each microcosm. In all panels, error bars denote SEM. In panels (a)-(b)  $n = 24$  for both 800 p.p.m and 440 p.p.m a[CO<sub>2</sub>].

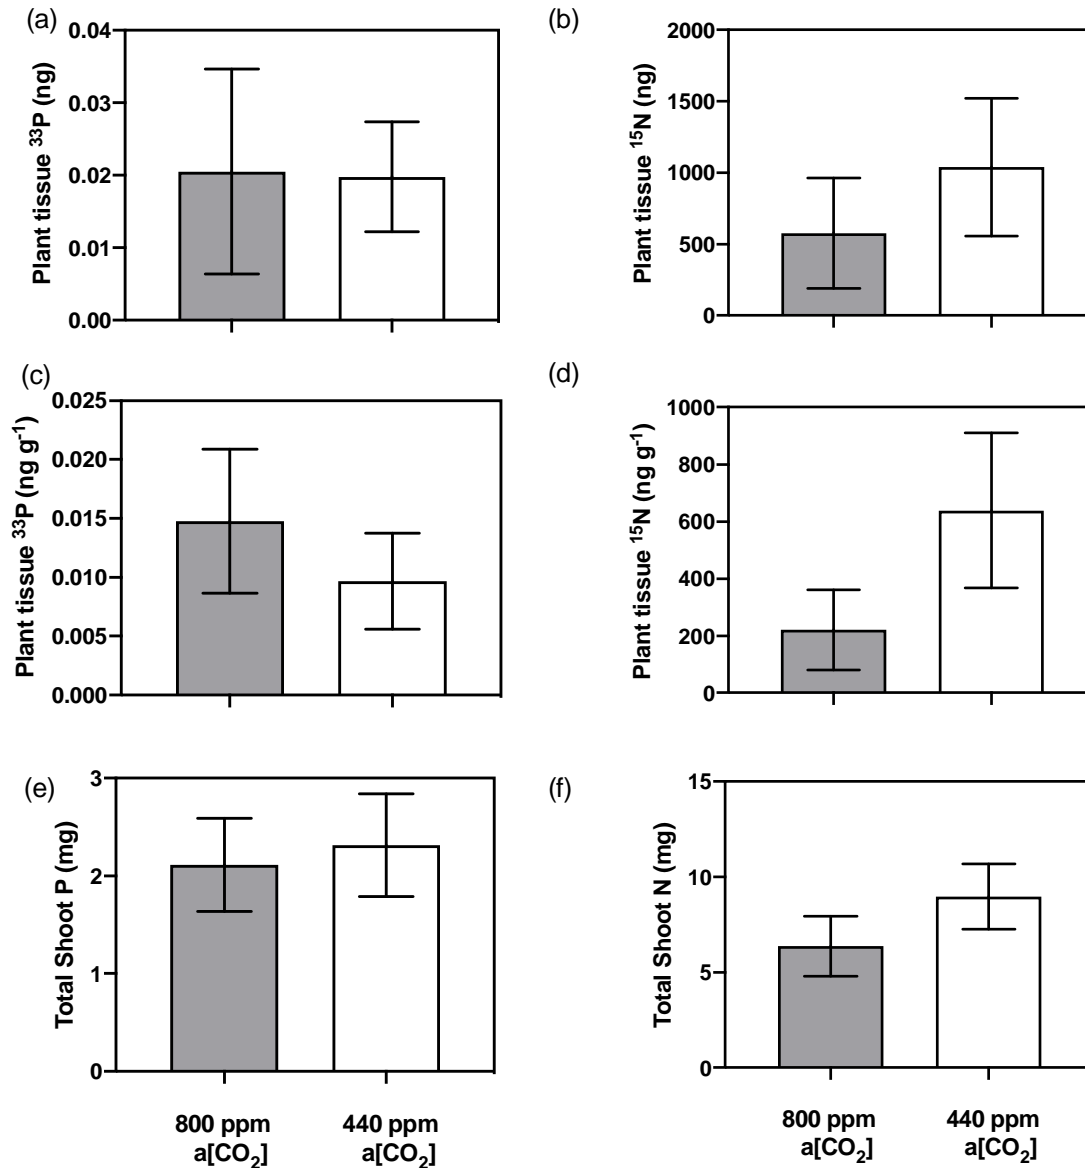

**Figure 3.** Fungal acquired nutrients by *Mucoromycotina* fine root endophyte (MFRE) fungi and total shoot nutrients in above ground plant tissue of *L. inundata*. (a) Total plant tissue <sup>33</sup>P content (ng) and (b) total plant tissue <sup>15</sup>N content (ng) in *L. inundata* tissue; (c) tissue concentration (ng g<sup>-1</sup>) of fungal-acquired <sup>33</sup>P and (d) tissue concentration of <sup>15</sup>N (ng g<sup>-1</sup>) in shoot tissue of *L. inundata*; (e) Total shoot P content (mg) equating to both plant and fungal acquired P and (f) total shoot N content (mg) equating to both plant and fungal acquired N in shoots of *L. inundata*. All experiments conducted at a[CO<sub>2</sub>] of 800 p.p.m. (grey bars) and 440 p.p.m. (white bars). All bars in each panel (a-d) represent the difference in isotopes between the static and rotated cores inserted into each microcosm. In all panels, error bars denote SEM. In panels (a)-(d) *n* = 12 and panels (e)-(f) *n* = 24 for both 800 p.p.m and 440 p.p.m a[CO<sub>2</sub>].

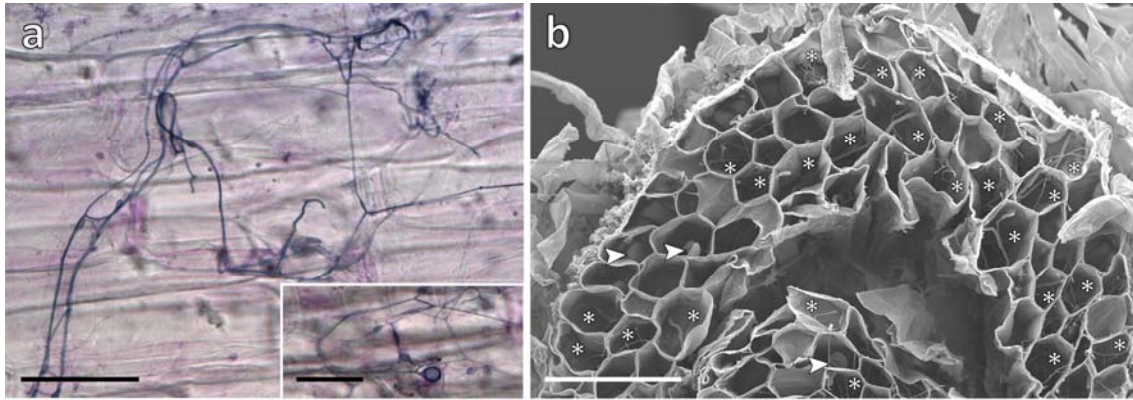

**Figure 4.** Experimental *Lycopodiella* roots colonised by MFRE. a) Light micrographs of trypan blue stained roots showing fine branching hyphae with intercalary and terminal small vesicles (see insert). b) Scanning electron micrograph of transverse section of root showing abundant branching hyphae (\*) and vesicles (arrowed). SEMs at this magnification (x150) were used to quantify % colonisation of roots of experimental plants grown under the two contrasting atmospheric [CO<sub>2</sub>] regimes, shown here in a plant grown under the elevated a[CO<sub>2</sub>] of 800 p.p.m. Scale bars: a) (and (a) insert) 50 µm; b) 100 µm.
